# Supplementary material
Source: PubMed Central journal article supplement (PMC6975630)
Supplement: ja9b06776_si_001.pdf [file ja9b06776_si_001.pdf]

**Supporting information for:**

**Mechanisms of Nanonewton Mechanostability in  
a Protein Complex Revealed by Molecular  
Dynamics Simulations and Single-Molecule Force  
Spectroscopy**

Rafael C. Bernardi<sup>\*,†,@</sup> Ellis Durner,<sup>‡,@</sup> Constantin Schoeler,<sup>‡</sup> Klara H.  
Malinowska,<sup>‡</sup> Bruna G. Carvalho,<sup>¶</sup> Edward A. Bayer,<sup>§</sup> Zaida Luthey-Schulten,<sup>†,||</sup>  
Hermann E. Gaub,<sup>‡</sup> and Michael A. Nash<sup>\*\*,⊥,#</sup>

<sup>†</sup>*Beckman Institute for Advanced Science and Technology, University of Illinois at  
Urbana-Champaign, 61801 Urbana, IL*

<sup>‡</sup>*Lehrstuhl für Angewandte Physik and Center for Nanoscience,  
Ludwig-Maximilians-Universität, 80799 Munich, Germany*

<sup>¶</sup>*School of Chemical Engineering, University of Campinas, 13083-852 Campinas, Brazil*

<sup>§</sup>*Department of Biomolecular Sciences, Weizmann Institute of Science, 76100 Rehovot,  
Israel*

<sup>||</sup>*Department of Chemistry, University of Illinois at Urbana-Champaign, 61801 Urbana, IL*

<sup>⊥</sup>*Department of Chemistry, University of Basel, 4058 Basel, Switzerland*

<sup>#</sup>*Department of Biosystems Science and Engineering, ETH Zurich, 4058 Basel,  
Switzerland.*

<sup>@</sup>*these authors contributed equally*

E-mail: \*rcbernardi@ks.uiuc.edu;\*\*michael.nash@unibas.ch

## Protein Sequences

### **pET28a-ybbR-HRV3C-6xHIS-CBM(C63S)-CttA-XDoc**

MGTDLSLEFIASKLALAVLFLFQGPLQHSHHHHPWTSASMANPVSGLNKVEFYNSNPS  
DTTNSINPQFKVTNTGSSAIDLKSLTLRYYYTVDGQKDQTFWSDHAAIIGSNNGSYNG  
ITSNVKGTFFVKMSSSTNNADTYLEISFTGGTLEPGAHVQIQGRFAKNDWSNYTQSN  
DYSFKSASQFVEWDQVTAYLNGVLVWGKEPGGSSVVPSTQPVTTPPATTKPPATTI  
PPSDDPNAVVPNTVTSVKTQYVEIESVDGFYFNTEDKFDTAQIKKAVLHTVYNEG  
YTGDDGVAVVLREYESEPDITAELTFGDATPANTYKAVENKFDYEIPVYNNATL  
KDAEGNDATVTVYIGLKGDTDLNIVDGRDATATLTYAATSTDGKDATTVALSP  
STLVGGNPESVYDDFSAFLSDVKVDAGKELTRFAKKAERLIDGRDASSILTFYTKSS  
VDQYKDMAANEPNKLWDIVTGDAEEE\*

### **pET28a-ybbR-HRV3C-6xHIS-CBM(C63S)-ScaB-XDoc**

MGTDLSLEFIASKLALAVLFLFQGPLQHSHHHHPWTSASMANPVSGLNKVEFYNSNPS  
DTTNSINPQFKVTNTGSSAIDLKSLTLRYYYTVDGQKDQTFWSDHAAIIGSNNGSYNG  
ITSNVKGTFFVKMSSSTNNADTYLEISFTGGTLEPGAHVQIQGRFAKNDWSNYTQSN  
DYSFKSASQFVEWDQVTAYLNGVLVWGKEPGGSSVVPSTQPVTTPPATTKPPATTI  
PPSDDPNAVVPATNSGDVSVYYTIVAGYFVSHDTGVRGNGEAGGFVKNQVVK  
ITKYTKDKNGNIIANDLDLANVNYNGYTPNKAYIDRFVGDPAQNPTDQTLANFADN  
FAYDIPVYYGGDQLVDENGQPLTVKAYIGVKGDTNLDVDFVDFGRDATATLTYARVS  
TDNYTEADTPISPAPFITGADDPLDDLAFLSDVDTNEWKDNWKLAREDRILDGR  
DATNILTYARASAGDGEYAGLDAQELWNTVVPNRFG\*

### **pET28a-CohE-CBM(C63S)-HIS-ybbR**

MGTALTDTRGMTYDLDPKDGSSAATKPVLEVTKKVFDTAADAAGQTVTVEFKVSG  
AEGKYATTGYHIYWDERLEVVAATKTGAYAKKGALEDSSLAKAENNGNGVFFVAS  
GADDDFGADGVMWTVELKVPADAKAGDVYPIDVAYQWDPSKGLFTDNKDSAQ  
GKLMQAYFFTQGIKSSSNPSTDEYLVKANATYADGYIAIKAGEPGSSVVPSTQPVTTP  
PATTKPPATTIPPSDDPNAMANTPVSGLNKVEFYNSNPSDTTNSINPQFKVTNTGSS

AIDLSKLTLRYYYYTVDGQKDQTFWSDHAAIIGSNGSYNGITSNVKGTFVKMSSSTNN  
ADTYLEISFTGGTLEPGAHVQIQGRFAKNDWSNYTQSNDYSFKSASQFVEWDQVTA  
YLNGVLVWGKEPGELKLPRSRHHHHHHGSLEVLFGPDSLEFIASKLA\*

## Supplementary Figures

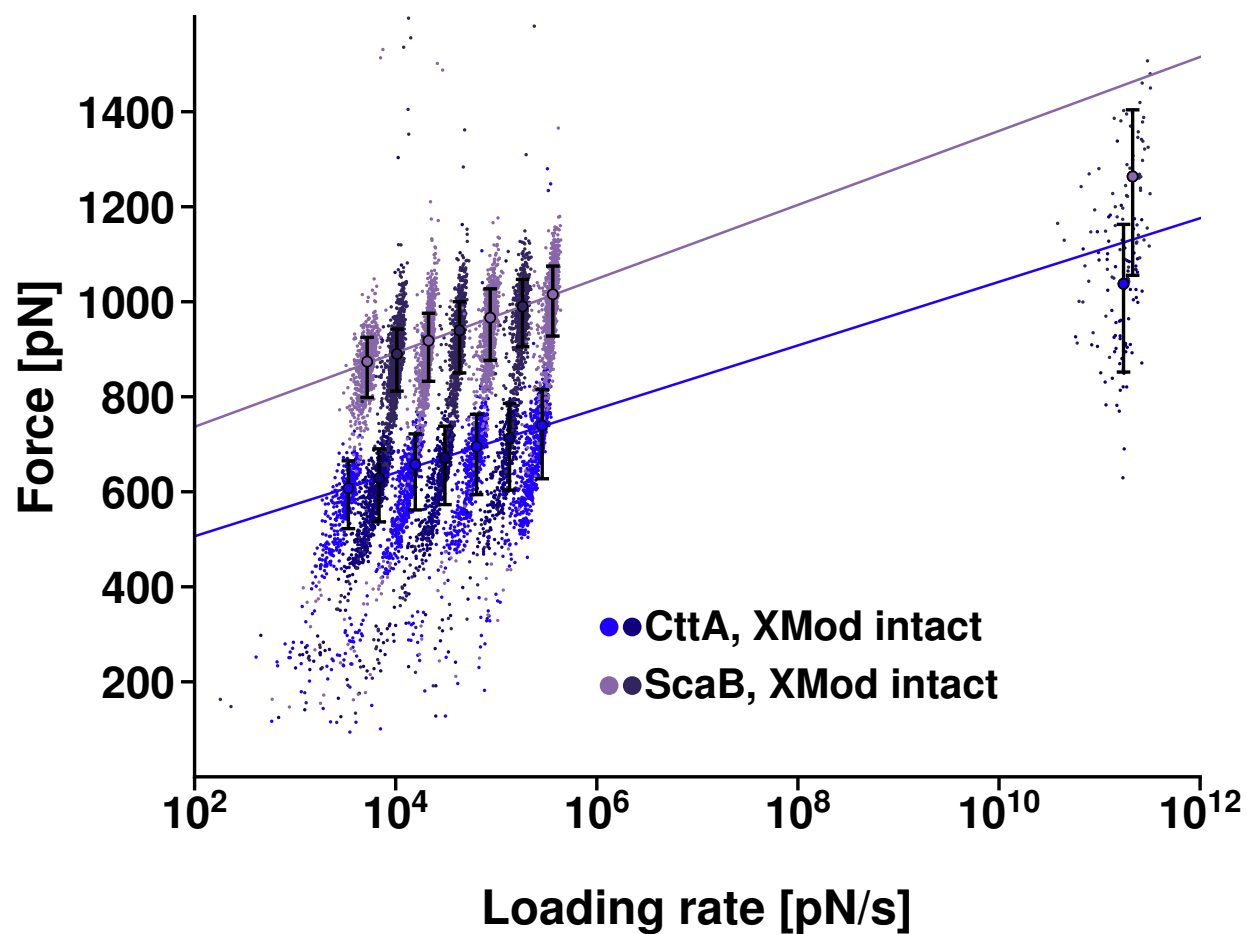

Figure S1: Dynamic force spectrum of curves with no apparent X-module unfolding fitted with a Bell Evans model. Extrapolating this fit to the simulated data reveals that the simulated rupture forces are approximately 8% lower than expected for the CttA-XDoc:CohE complex and 14% lower than expected for the ScaB-XDoc:CohE complex.

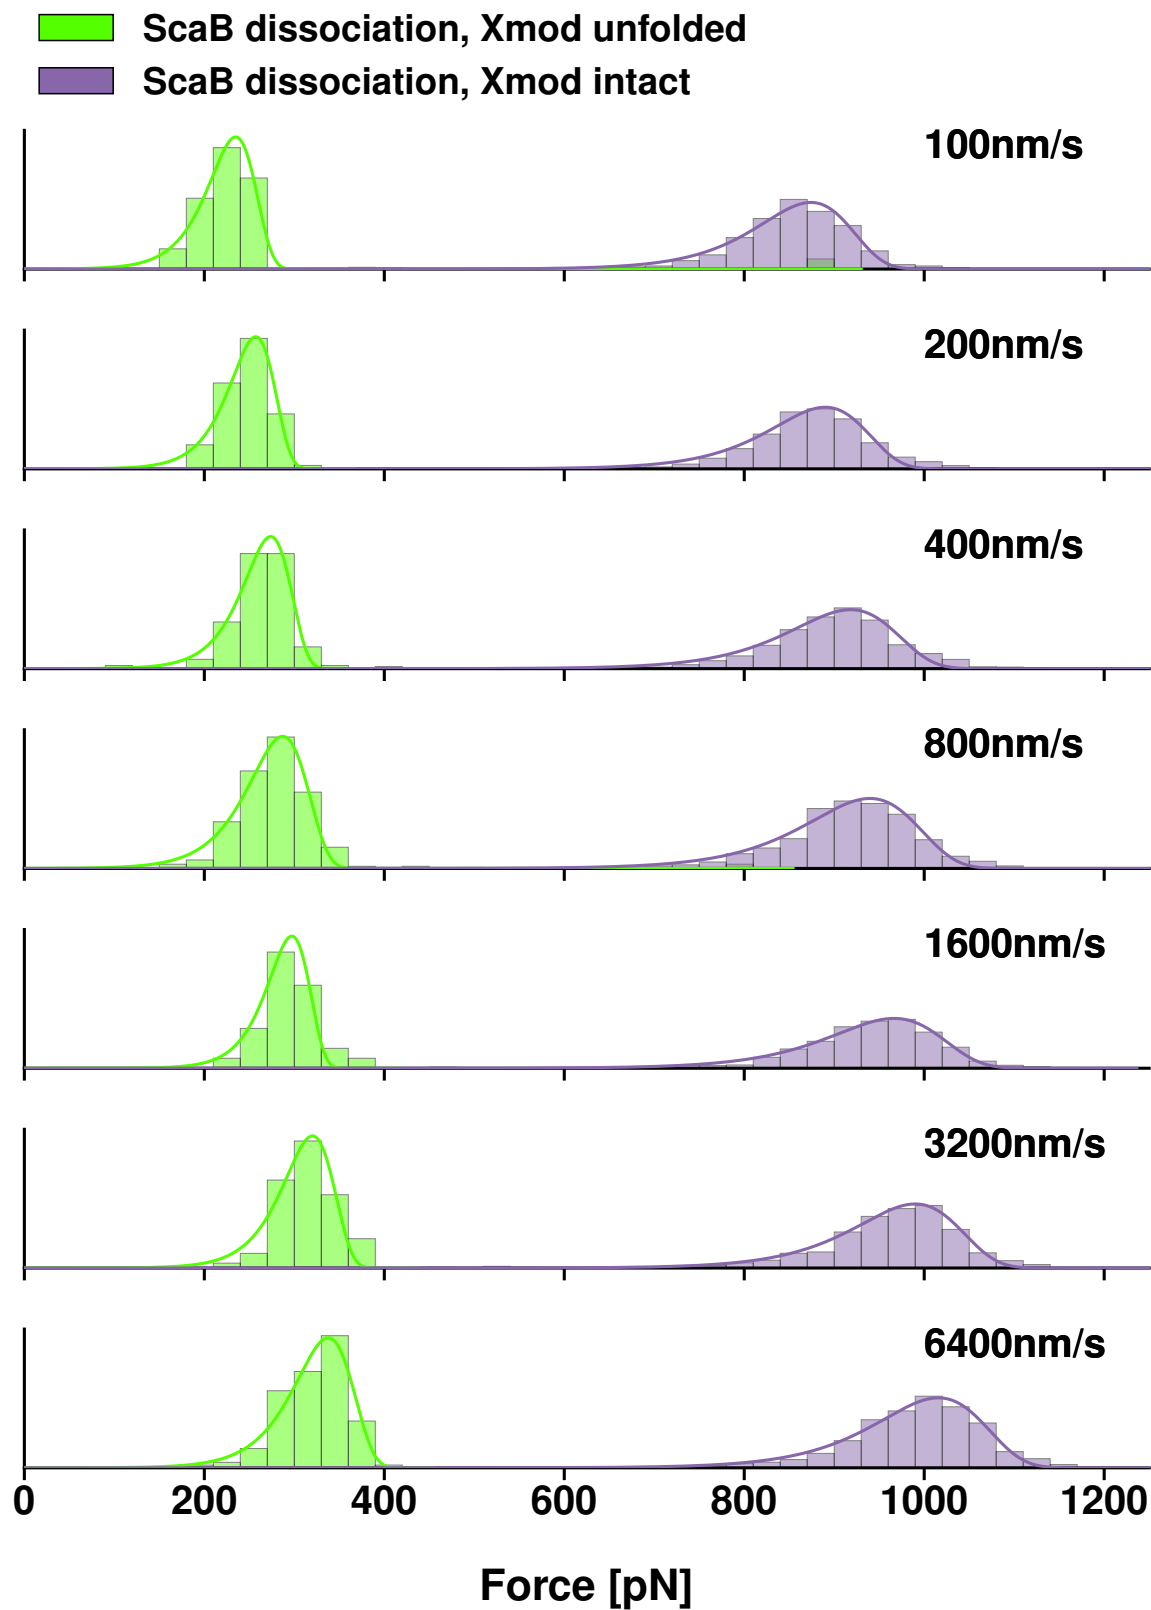

Figure S2: **Complex rupture forces of *Rf* ScaB-XDoc:CoHE.** Green bars shows the rupture force of the complex following Xmod unfolding. Purple bars show the rupture force of the complex with Xmod intact.

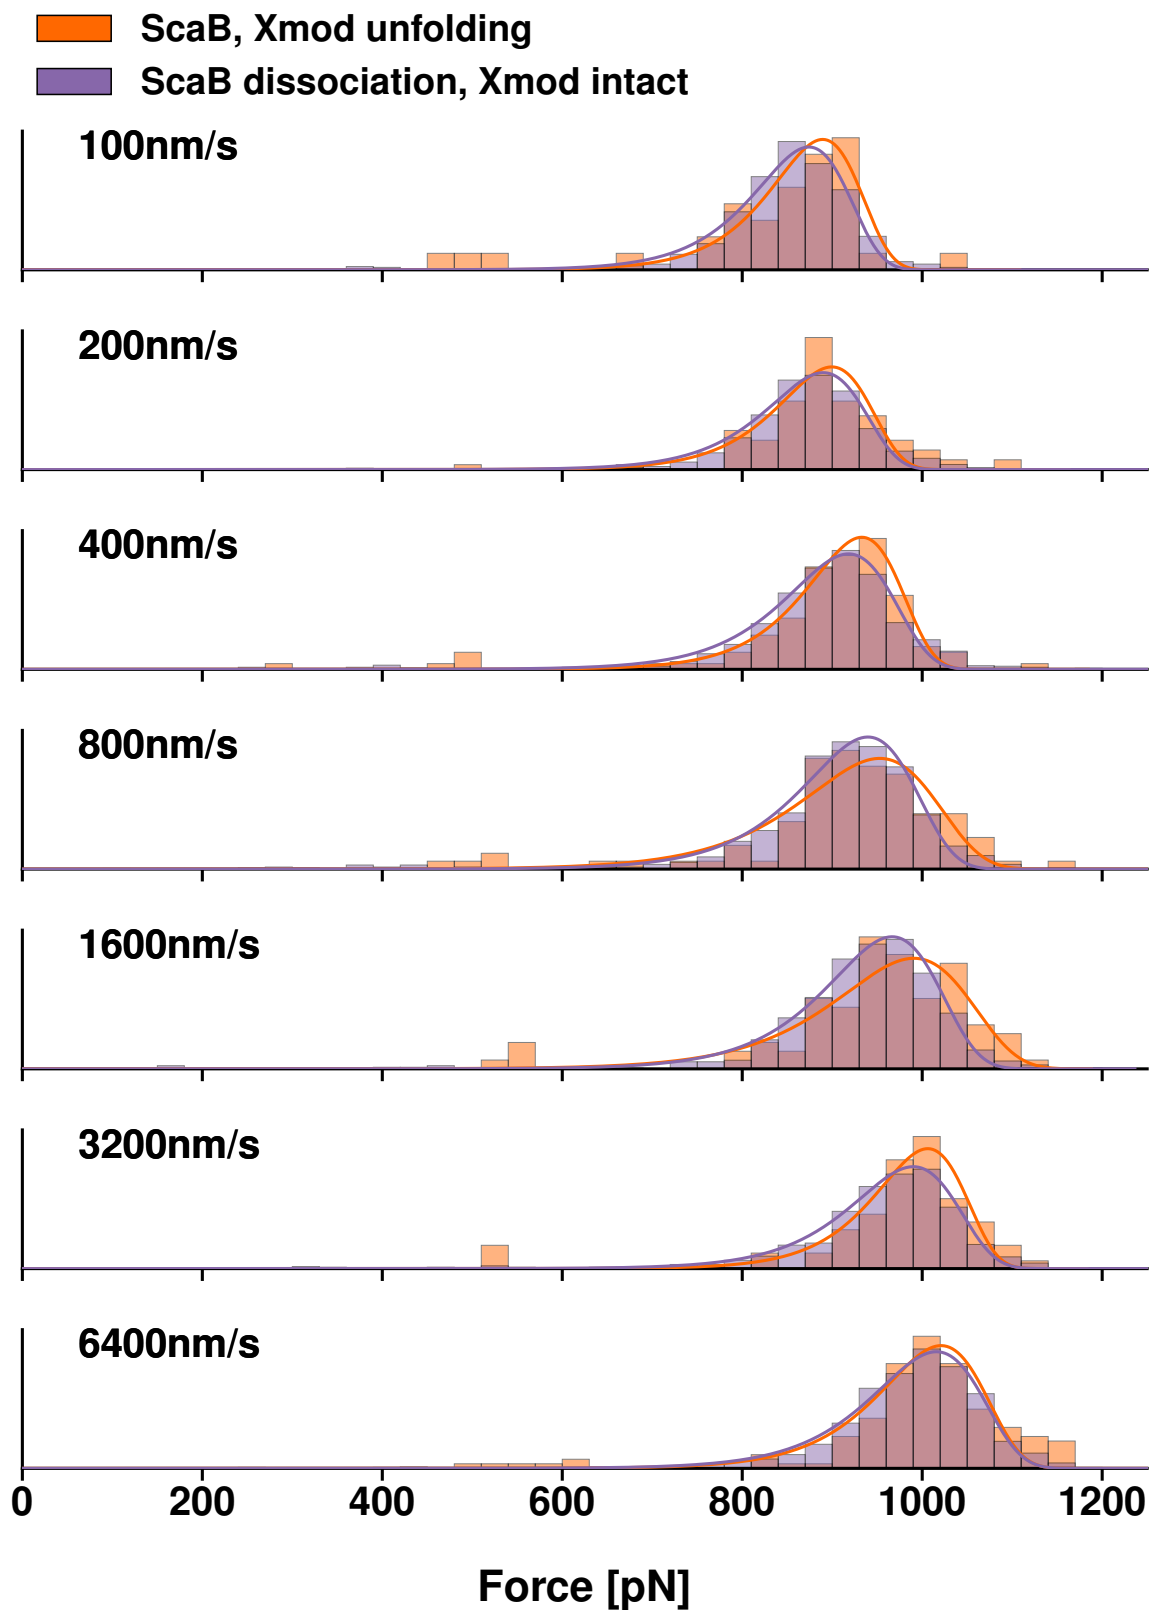

Figure S3: Complex rupture forces with XMod intact vs. X-module unfolding forces for *Rf* ScaB-XDoc:CohE. Orange bars show the unfolding force distribution of Xmod domains. Purple bars show the force distribution of complex rupture events with Xmod intact.

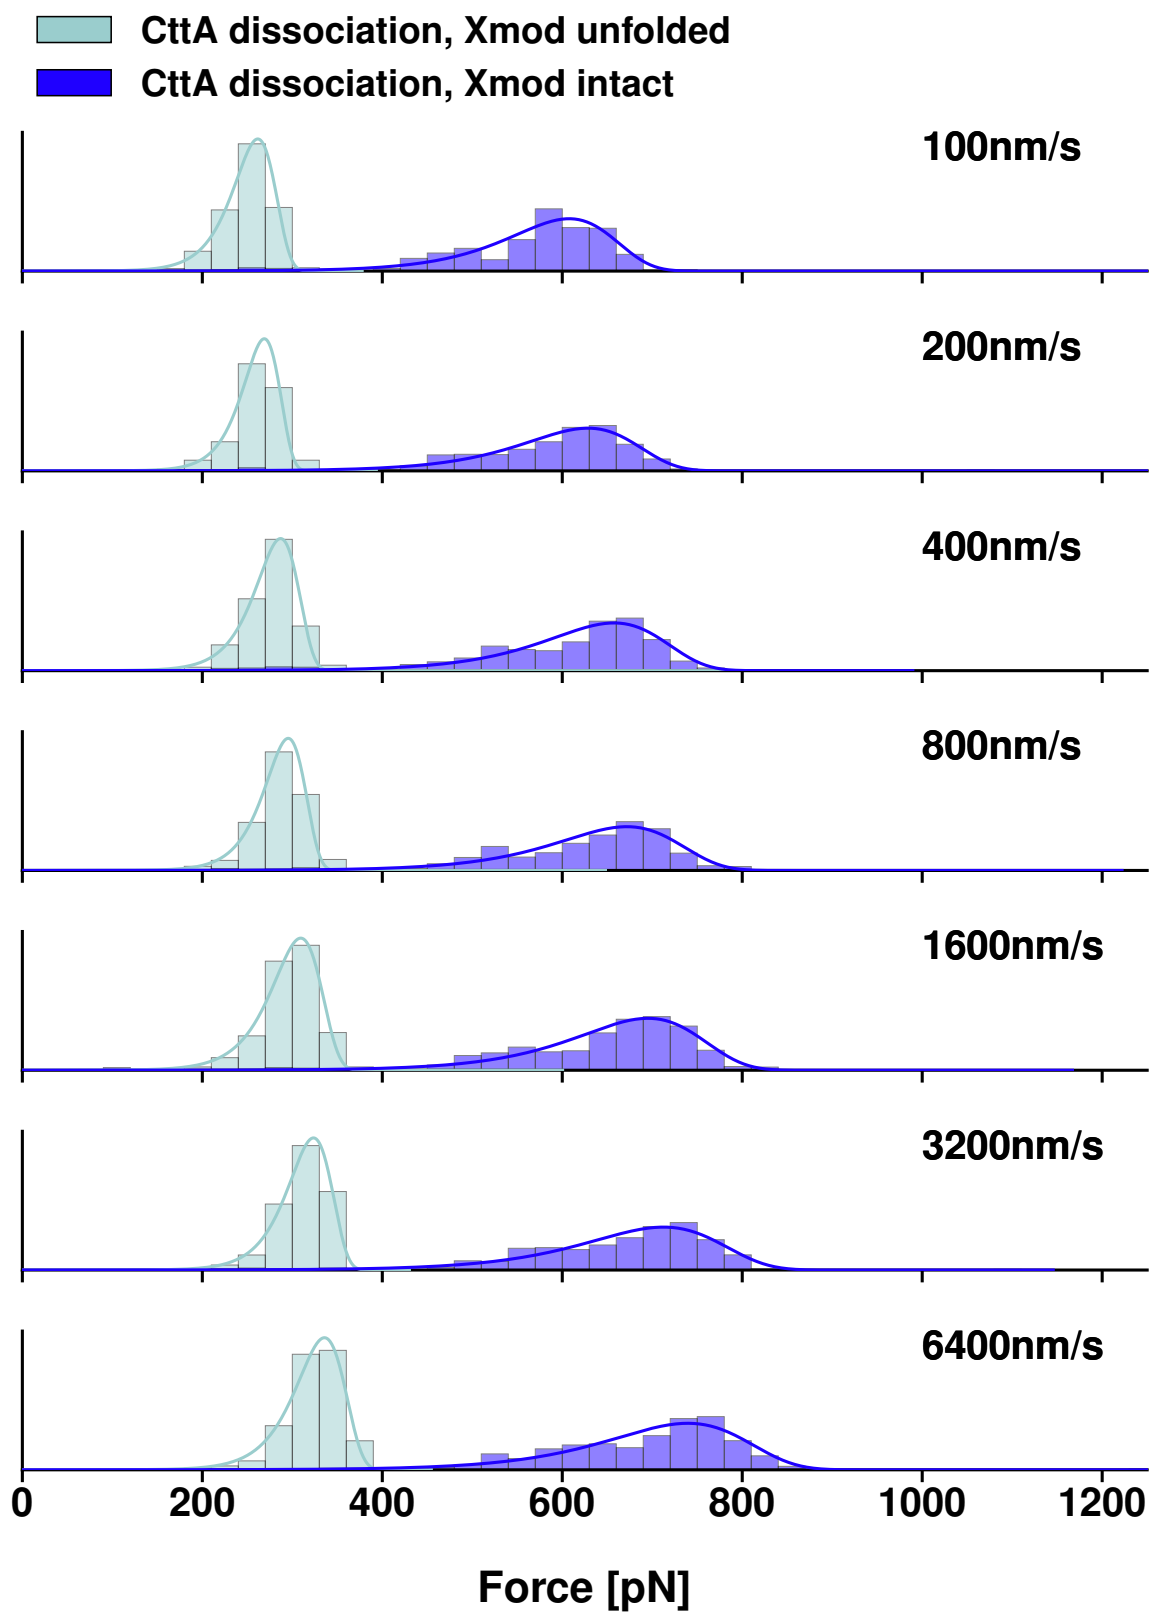

Figure S4: **Complex dissociation forces of *Rf* CttA-XDoc:CohE.** Teal bars shows the rupture forces of the complex following XMod unfolding. Blue bars show the rupture force distribution of the complex with XMod intact.

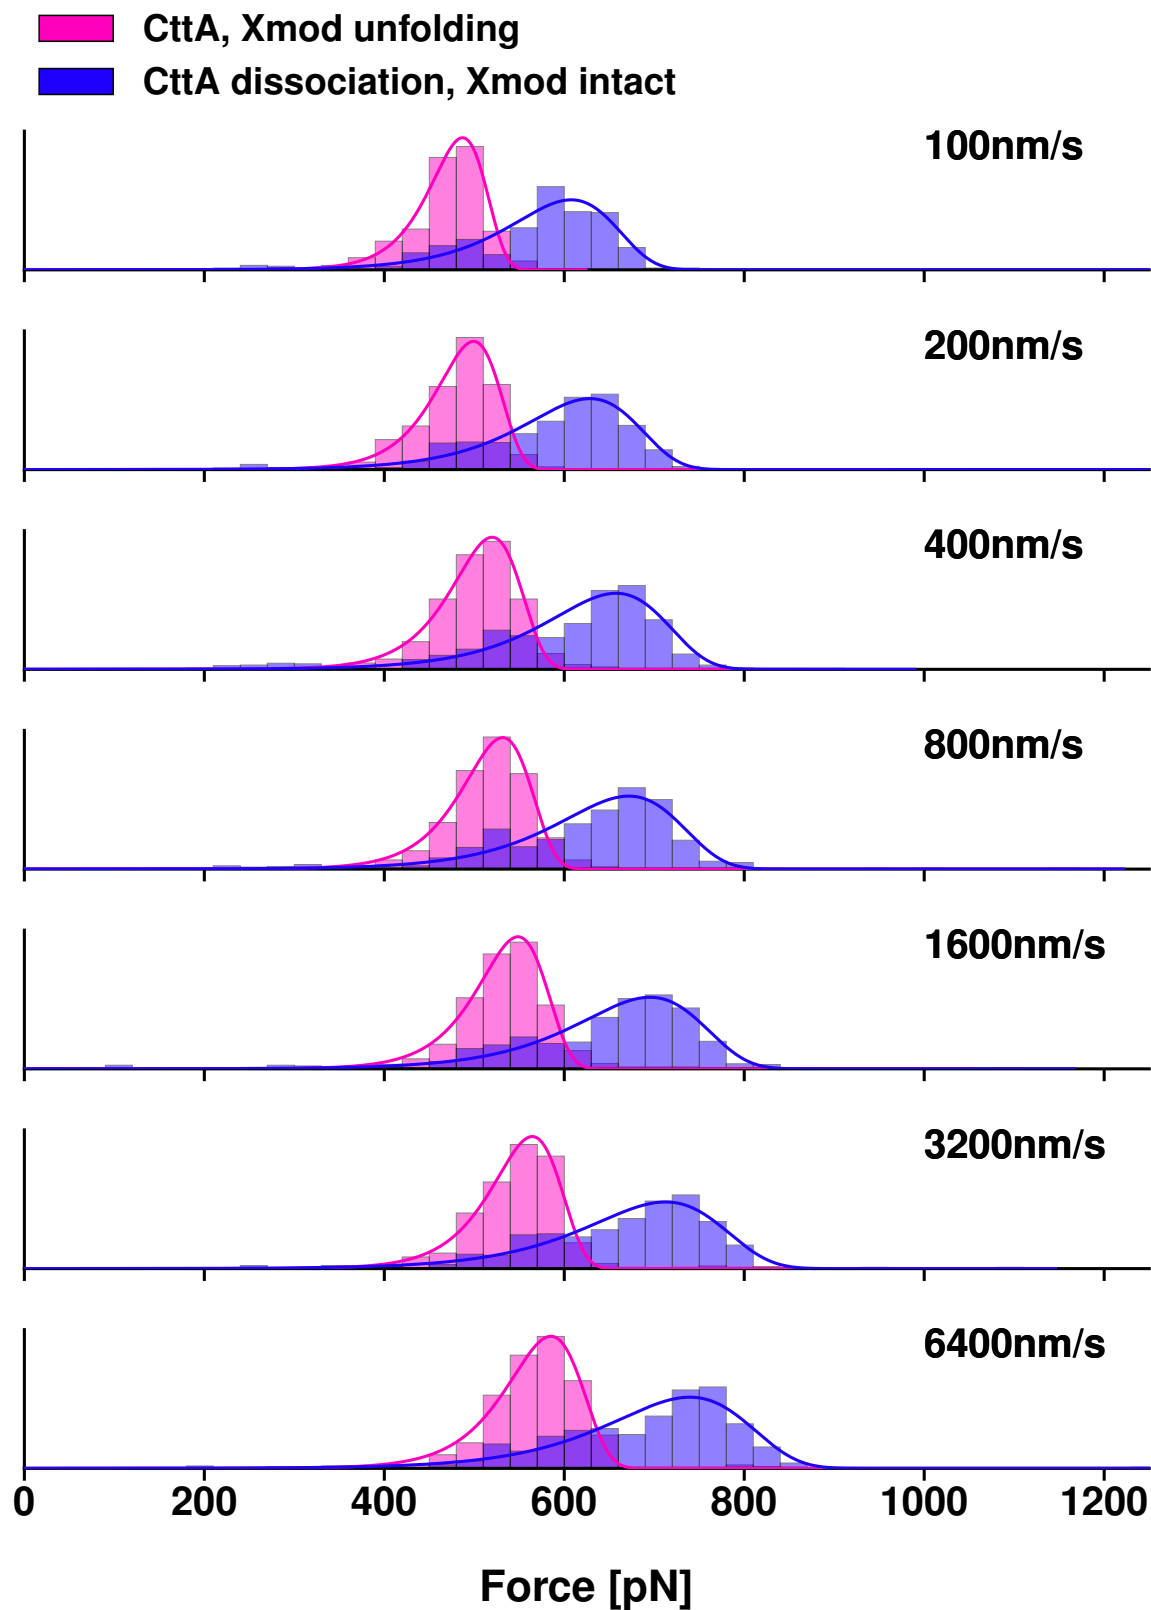

Figure S5: Complex rupture forces with Xmod intact vs. X-module unfolding forces for *Rf* CttA-XDoc:CohE. Pink bars show the unfolding force distribution of Xmod domains. Blue bars show the force distribution of complex rupture events with XMod intact.



## A - ScaB

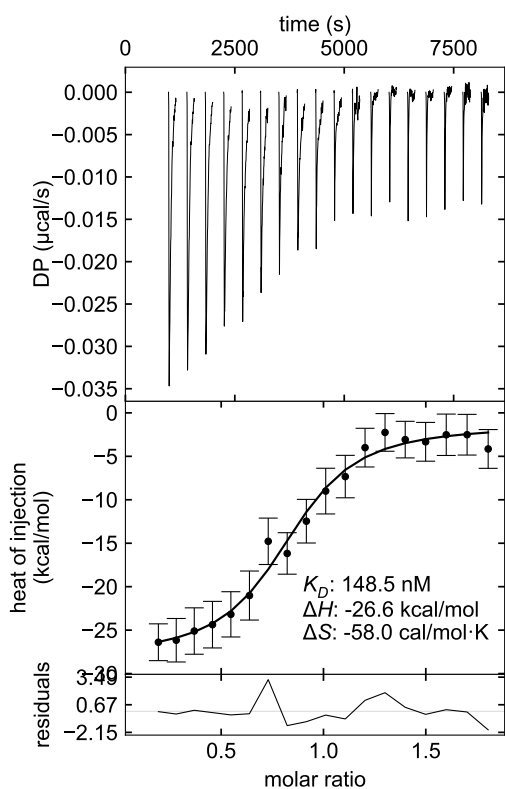

## B - CttA

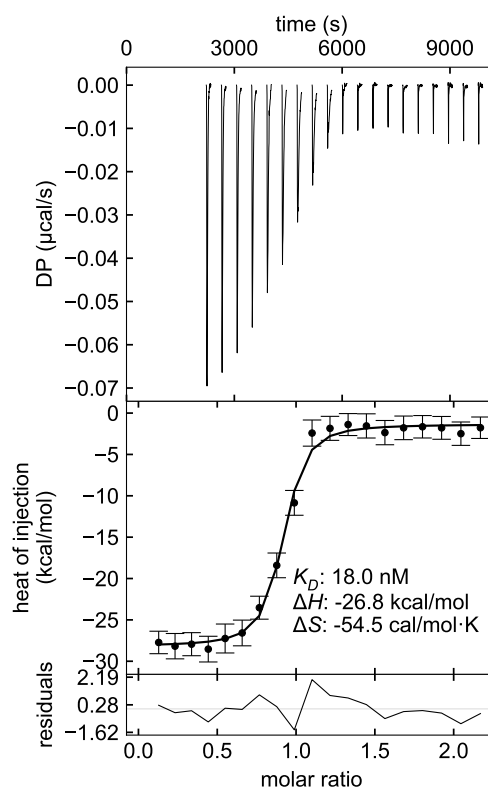

Figure S6: **Isothermal titration calorimetry.** **A:** The calorimeter's cell contained ybbR-CBM(C63S)-ScaB-XDoc at  $4.04 \mu\text{M}$ , the injection syringe  $35.0 \mu\text{M}$  CohE-NGL. **B:** The calorimeter's cell contained ybbR-CBM(C63S)-CttA-XDoc at  $4.04 \mu\text{M}$ , the injection syringe contained  $34.7 \mu\text{M}$  CohE-NGL.
